# Supplementary material for: Iron–nitrogen co-doped hierarchically mesoporous carbon spheres as highly efficient electrocatalysts for the oxygen reduction reaction
Source: Royal Society of Chemistry journal article supplement (doi:10.1039/c6ra26917f), 2017-01-01
Supplement: c6ra26917f1.pdf [file c6ra26917f1.pdf]

## Supporting Information

### **Iron-nitrogen co-doped hierarchically mesoporous carbon spheres as highly efficient electrocatalysts for oxygen reduction reaction**

*You-Lin Liu<sup>†</sup>, Xue-Yan Xu<sup>†</sup>, Cheng-Xiang Shi, Xin-Wei Ye, Ping-Chuan Sun and Tie-Hong Chen\**

Institute of New Catalytic Materials Science, School of Materials Science and Engineering, Key Laboratory of Advanced Energy Materials Chemistry (MOE), Collaborative Innovation Center of Chemical Science and Engineering (Tianjin), Nankai University, Tianjin 300350, PR China

\* E-mail: [chenth@nankai.edu.cn](mailto:chenth@nankai.edu.cn)

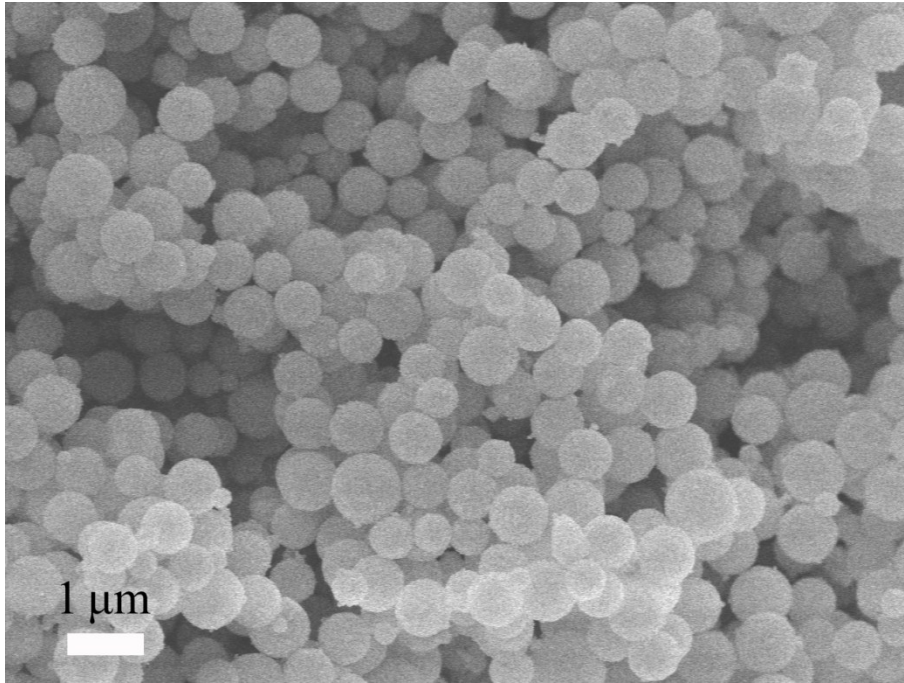

**Figure S1** Typical FESEM image of hierarchically mesoporous silica template.

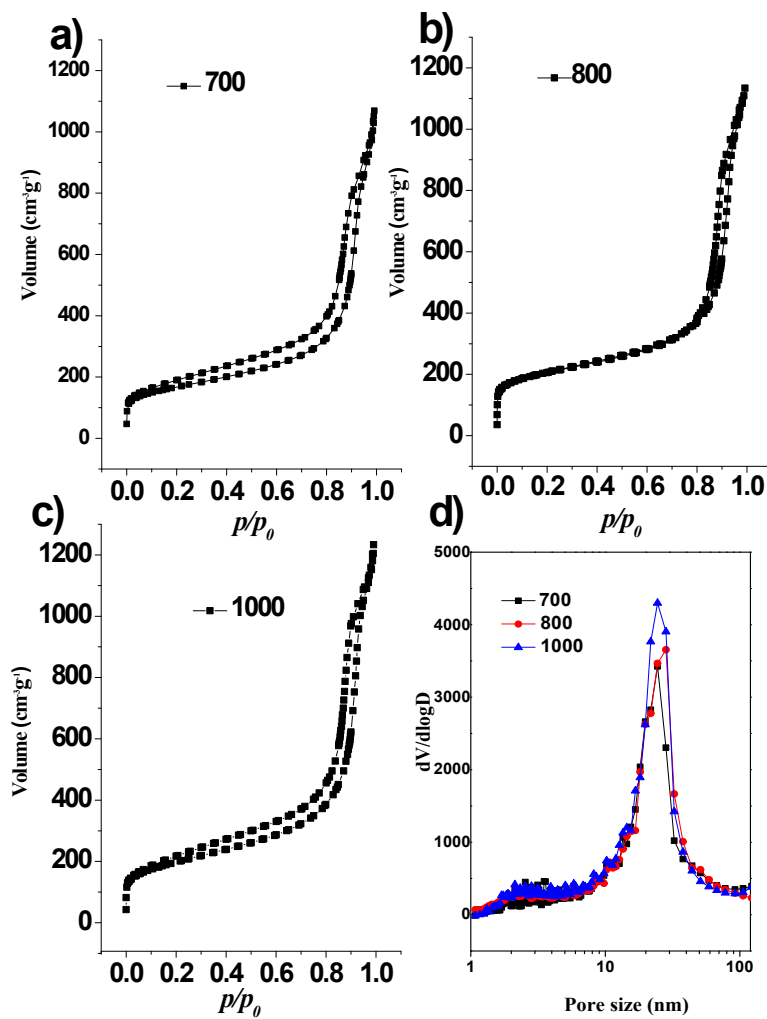

**Figure S2.** a, b, c) Nitrogen adsorption-desorption isotherms of Fe-N-CS-T obtained from different carbonization temperature of 700, 800 and 1000 °C, respectively. d) Their corresponding pore size distribution curves.

Table S1. BET surface areas, total pore volumes and pore size distribution of Fe-N-CS-TObtained from different carbonization temperature.

| catalysts                     | T (°C) <sup>a</sup> | S <sub>BET</sub> (m <sup>2</sup> /g) <sup>b</sup> | V <sub>tot</sub> (cm <sup>3</sup> /g) <sup>c</sup> | d <sub>meso</sub> (nm) <sup>d</sup> |
|-------------------------------|---------------------|---------------------------------------------------|----------------------------------------------------|-------------------------------------|
| Fe-N-CS-700                   | 700                 | 602                                               | 1.33                                               | 24                                  |
| Fe-N-CS-800                   | 800                 | 724                                               | 1.51                                               | 28                                  |
| Fe-N-CS-900                   | 900                 | 758                                               | 1.59                                               | 28                                  |
| Fe-N-CS-1000                  | 1000                | 695                                               | 1.63                                               | 24                                  |
| N-CS-900                      | 900                 | 429                                               | 1.18                                               | 22                                  |
| Fe-N-CS/SiO <sub>2</sub> -900 | 900                 | 302                                               | 0.29                                               | --                                  |

<sup>a</sup> Carbonization temperature.

<sup>b</sup> BET specific surface areas obtained from N<sub>2</sub> adsorption isotherm in the range of P/P<sub>0</sub> = 0.05-0.3.

<sup>c</sup> Total pore volume was obtained at P/P<sub>0</sub> of 0.95.

<sup>d</sup>Primary mesopore diameter calculated from BJH method.

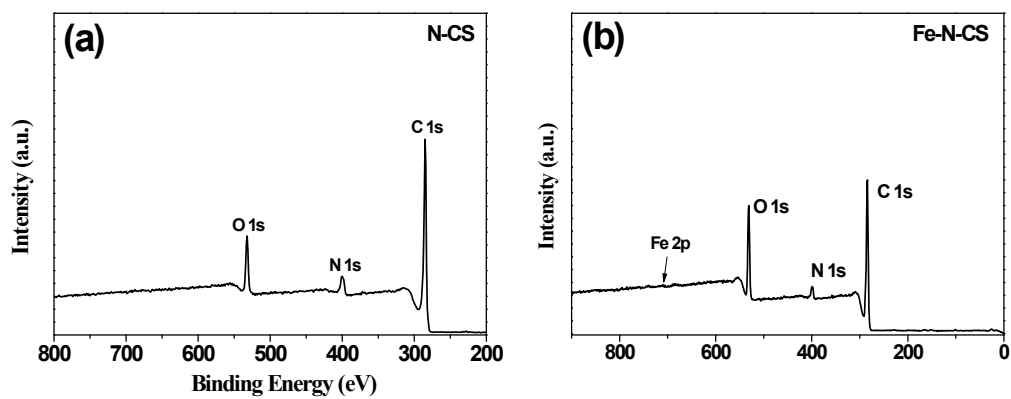

**Figure S3** XPS survey of (a) N-CS-900 and (b) Fe-N-CS-900.

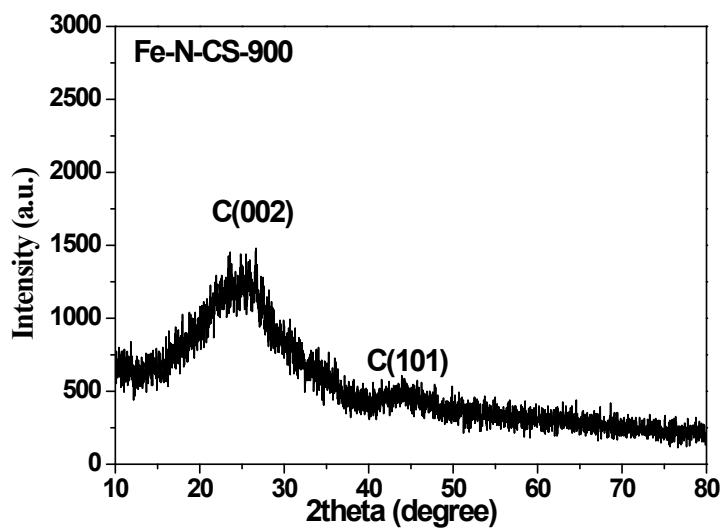

**Figure S4** XRD pattern of Fe-N-CS-900 sample.

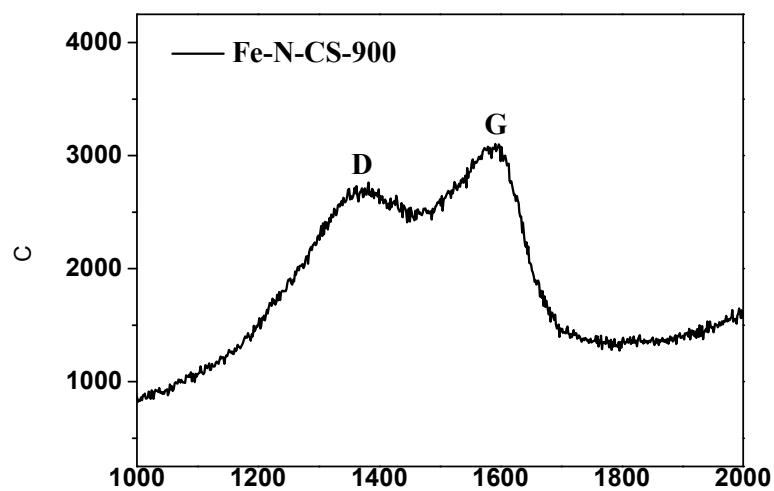

**Figure S5** Raman spectrum of Fe-N-CS-900 sample.

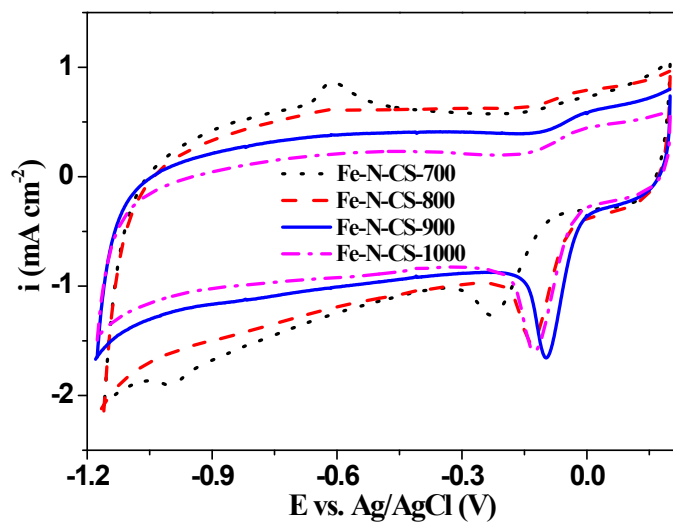

**Figure S6** a, b, c) Cyclic voltammograms of Fe-N-CS-700, Fe-N-CS-800 and Fe-N-CS-900, Fe-N-CS-1000 samples on a glassy carbon rotating disk electrode in  $\text{O}_2$ -saturated 0.1 M KOH with scan rate of  $20 \text{ mV s}^{-1}$ .



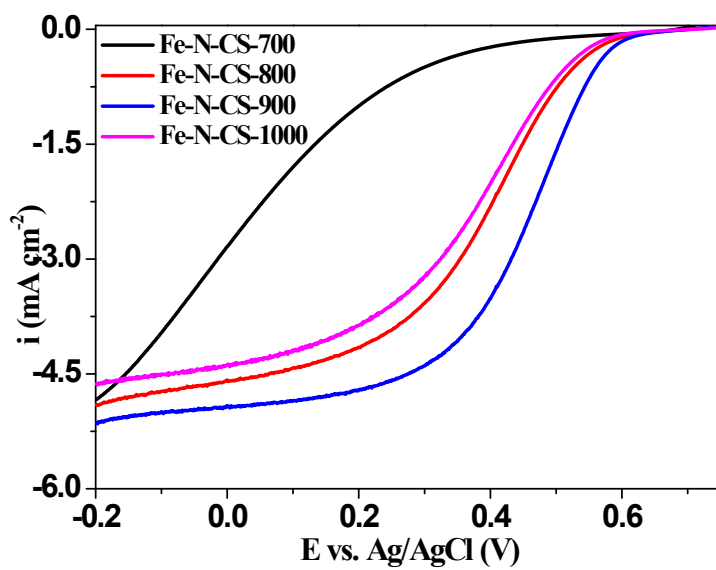

**Figure S7** LSV curves of Fe-N-CS-700, Fe-N-CS-800, Fe-N-CS-900 and Fe-N-CS-1000 catalysts modified electrodes at rotation rate of 1600 rpm in O<sub>2</sub>-saturated acidic media.

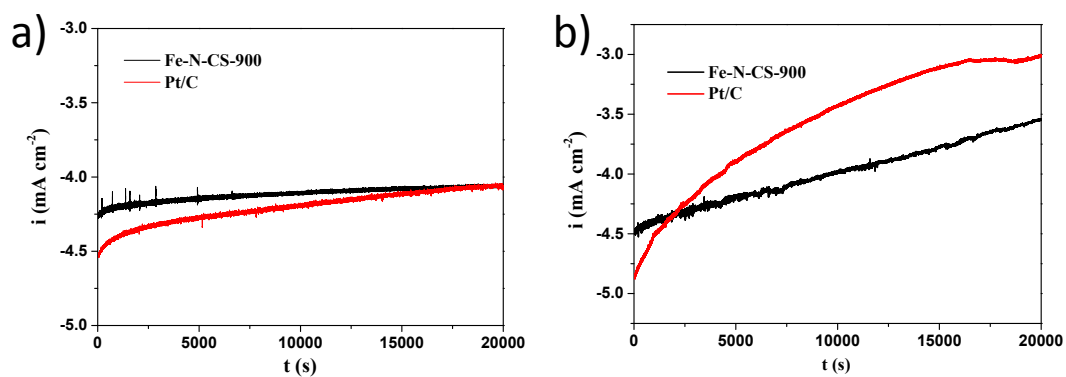

**Figure S8** a) Chronoamperometric responses for the ORR on the Fe-N-CS-900 catalyst and commercial Pt/C catalyst modified electrodes in O<sub>2</sub>-saturated alkaline media for 20000 s.

b) Chronoamperometric responses for the ORR on the Fe-N-CS-900 catalyst and commercial Pt/C catalyst modified electrodes in O<sub>2</sub>-saturated acidic media for 20000 s.
